# Supplementary material
Source: MDPI journal article supplement (https://www.mdpi.com/2072-4292/12/21/3552)
Supplement: s1 [file s1]

**Supplementary Materials: Figure S1.** The variation of F1-scores of three schemes with removing building components at different rates (20%, 40%, 60%, 80%, and 100%)

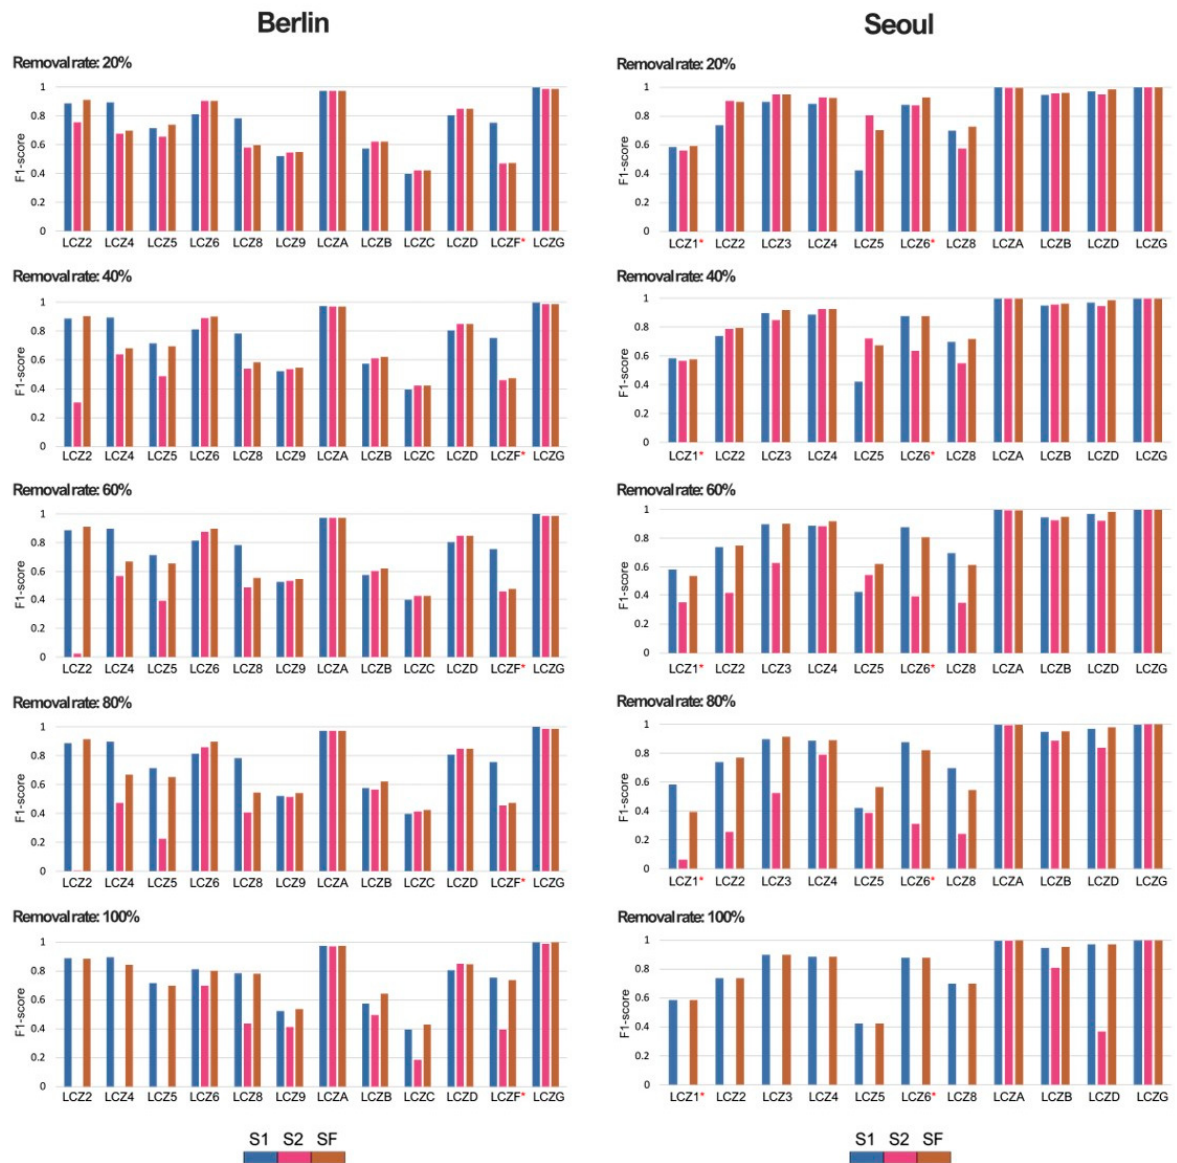

**Figure S1.** The variation of F1-scores of three schemes with removing building components at different rates (20%, 40%, 60%, 80%, and 100%).
